# Supplementary material for: Dose–effect meta-analysis for psychopharmacological interventions using randomised data
Source: HighWire-hosted journal article supplement (doi:10.1136/ebmental-2021-300278), 2022-01-18
Supplement: ebmental-2021-300278supp001_data_supplement.csv [file ebmental-2021-300278supp001_data_supplement.csv]

	Study_No	Overall_study_RoB	Study_year	Drug	Dose_range	No_randomised	Responders	Dropouts_total	Dropouts_sideeffects	remitters	age	weeks	hayasaka_ddd	ddd	jakubovski_ddd	meps_ddd	Dose_delivered_mean	type	logRR	selogRR	logRRdrop	selogRRdrop	logRRdropAE	selogRRdropAE	logRRrem	selogRRrem	exc	excdrop	excdropAE	excrem
placebo	1	Moderate risk	2001	placebo	Licensed	149	69	40	4	24	43	6	0	0	0	0	0	cc	0	NA	0	NA	0	NA	0	NA	FALSE	FALSE	FALSE	FALSE
fluoxetine	1	Moderate risk	2001	fluoxetine	Licensed	137	77	19	3	25	42.9	6	20	20	20	20	20	cc	0.193664297373759	0.116056396382257	-0.660475094830162	0.252231836766104	-0.203716692334447	0.754534726745143	0.124787374637589	0.260107645404169	FALSE	FALSE	FALSE	FALSE
placebo1	2	Low risk	2001	placebo	Licensed	137	63	22	5	27	41.2	6	0	0	0	0	0	cc	0	NA	0	NA	0	NA	0	NA	FALSE	FALSE	FALSE	FALSE
paroxetine	2	Low risk	2001	paroxetine	Licensed	138	74	22	6	36	40.9	6	23.6	20	20	20.4	20	cc	0.153657607483557	0.121823160778	-0.00727275932907981	0.276339363870774	0.175048797464875	0.593397859603555	0.280409313122701	0.224207867681373	FALSE	FALSE	FALSE	FALSE
placebo2	7	Low risk	2002	placebo	Licensed	158	91	21	4	38	41.6	6	0	0	0	0	0	cc	0	NA	0	NA	0	NA	0	NA	FALSE	FALSE	FALSE	FALSE
fluoxetine1	7	Low risk	2002	fluoxetine	Licensed	148	89	17	7	30	41.3	6	20	20	20	20	20	cc	0.0431596224781414	0.0955986159124878	-0.145926334404355	0.305543297013705	0.624998547198275	0.616255849608209	-0.171006018801379	0.215785199043424	FALSE	FALSE	FALSE	FALSE
placebo3	21	Moderate risk	NA	placebo	Licensed	139	63	35	9	21	42.3	8	0	0	0	0	0	cc	0	NA	0	NA	0	NA	0	NA	FALSE	FALSE	FALSE	FALSE
paroxetine1	21	Moderate risk	NA	paroxetine	Licensed	147	81	34	10	37	42.3	8	23.6	20	20	20.4	20	cc	0.195355774632861	0.119254891692583	-0.0849461905212968	0.209728938357488	0.0494018620097819	0.443975388302504	0.510436821272757	0.246270398045162	FALSE	FALSE	FALSE	FALSE
placebo4	85	Moderate risk	NA	placebo	Licensed	89	42	21	NA	26	NA	6	0	0	0	0	0	cc	0	NA	0	NA	0	NA	0	NA	FALSE	FALSE	TRUE	FALSE
citalopram.193	85	Moderate risk	NA	citalopram	Licensed	88	48	23	NA	31	NA	6	20	20	12	24.6	20	cc	0.144830947878456	0.148469746827564	0.10227133345966	0.26172068521383	NA	NA	0.187190221717598	0.219362739675295	FALSE	FALSE	TRUE	FALSE
citalopram.194	85	Moderate risk	NA	citalopram	Licensed	97	50	23	NA	34	NA	6	40	40	24	49.2	40	cc	0.0882787783735347	0.149212232751972	0.00489716943448369	0.263727274057724	NA	NA	0.182189377823436	0.215239563651122	FALSE	FALSE	TRUE	FALSE
placebo5	86	Moderate risk	1992	placebo	Licensed	66	28	20	2	14	NA	6	0	0	0	0	0	cc	0	NA	0	NA	0	NA	0	NA	FALSE	FALSE	FALSE	FALSE
citalopram.196	86	Moderate risk	1992	citalopram	Licensed	70	32	19	3	16	NA	6	20	20	12	24.6	20	cc	0.0746908926015892	0.19371901372105	-0.110133794410484	0.270544542562106	0.346624608085231	0.896602533955879	0.0746908926015892	0.323251205707484	FALSE	FALSE	FALSE	FALSE
citalopram.197	86	Moderate risk	1992	citalopram	Licensed	64	35	15	3	24	NA	6	40	40	24	49.2	40	cc	0.253915209980963	0.183055180571868	-0.256910413785027	0.293070216015124	0.436236766774918	0.895855355613739	0.569768159399441	0.286912395939463	FALSE	FALSE	FALSE	FALSE
placebo6	87	Moderate risk	1999	placebo	Licensed	129	42	41	8	20	38	6	0	0	0	0	0	cc	0	NA	0	NA	0	NA	0	NA	FALSE	FALSE	FALSE	FALSE
citalopram.203	87	Moderate risk	1999	citalopram	Very low	131	61	36	10	27	NA	6	10	10	6	12.3	10	cc	0.357819327050463	0.157535521904487	-0.145438047087677	0.191787632316219	0.20775863247473	0.457836733158496	0.284719673610859	0.267677999219737	FALSE	FALSE	FALSE	FALSE
citalopram.199	87	Moderate risk	1999	citalopram	Licensed	130	61	39	21	26	39	6	20	20	12	24.6	20	cc	0.365482199796033	0.1573490411654	-0.0577324666685717	0.185975869043973	0.957358849949677	0.396452773911652	0.254642218373581	0.270217121561041	FALSE	FALSE	FALSE	FALSE
citalopram.200	87	Moderate risk	1999	citalopram	Licensed	131	80	39	21	34	39	6	40	40	24	49.2	40	cc	0.628972097551034	0.144651298088777	-0.0653953394141408	0.186133671786458	0.949695977204108	0.396526823617636	0.515243332222691	0.253034066748188	FALSE	FALSE	FALSE	FALSE
citalopram.201	87	Moderate risk	1999	citalopram	High	129	73	50	21	30	38	6	60	60	36	73.8	60	cc	0.552789822865023	0.148338390100196	0.198450938723838	0.169959900957393	0.965080896043587	0.396377561991159	0.405465108108164	0.260440890346238	FALSE	FALSE	FALSE	FALSE
placebo7	97	Moderate risk	2004	placebo	Licensed	8	NA	NA	NA	NA	41.5	4	0	0	0	0	0	cc	0	NA	0	NA	0	NA	0	NA	TRUE	TRUE	TRUE	TRUE
citalopram	97	Moderate risk	2004	citalopram	Licensed	8	NA	NA	NA	NA	39.1	4	20	20	12	24.6	20	cc	NA	NA	NA	NA	NA	NA	NA	NA	TRUE	TRUE	TRUE	TRUE
placebo8	100	Low risk	2006	placebo	Licensed	130	51	8	3	25	49.4	6	0	0	0	0	0	cc	0	NA	0	NA	0	NA	0	NA	FALSE	FALSE	FALSE	FALSE
citalopram1	100	Low risk	2006	citalopram	Licensed	127	71	6	2	38	49.3	6	20	20	12	24.6	20	cc	0.354201608313981	0.134632933337907	-0.26433470845479	0.525452512817598	-0.382117744111173	0.904304710754618	0.442057698855176	0.225276421387914	FALSE	FALSE	FALSE	FALSE
placebo9	120	Moderate risk	2001	placebo	Licensed	75	28	31	NA	21	41.4	8	0	0	0	0	0	cc	0	NA	0	NA	0	NA	0	NA	FALSE	FALSE	TRUE	FALSE
fluoxetine2	120	Moderate risk	2001	fluoxetine	Licensed	37	15	14	NA	11	39.7	8	20	20	20	20	20	cc	0.0824158918190921	0.249039338299378	-0.0883596739778015	0.251647125126317	NA	NA	0.0599430359670334	0.313317376102536	FALSE	FALSE	TRUE	FALSE
placebo10	121	Moderate risk	2001	placebo	Licensed	90	24	29	3	18	43.2	8	0	0	0	0	0	cc	0	NA	0	NA	0	NA	0	NA	FALSE	FALSE	FALSE	FALSE
paroxetine2	121	Moderate risk	2001	paroxetine	Licensed	89	38	31	10	31	44.4	8	23.6	20	20	20.4	20	cc	0.470705629976565	0.213624413335789	0.0778646750967974	0.210698260480545	1.21514610492406	0.641082106415428	0.554788747187107	0.255864327143105	FALSE	FALSE	FALSE	FALSE
placebo11	122	Moderate risk	2001	placebo	Licensed	89	27	37	10	26	40.1	8	0	0	0	0	0	cc	0	NA	0	NA	0	NA	0	NA	FALSE	FALSE	FALSE	FALSE
paroxetine3	122	Moderate risk	2001	paroxetine	Licensed	87	34	38	10	31	40.3	8	23.6	20	20	20.4	20	cc	0.253251909689388	0.209089918009397	0.0493964981597174	0.174964592335044	0.0227282510775561	0.421034193469197	0.19861891754122	0.219064819283984	FALSE	FALSE	FALSE	FALSE
placebo12	125	Low risk	2004	placebo	Licensed	93	41	18	3	28	43.7	8	0	0	0	0	0	cc	0	NA	0	NA	0	NA	0	NA	FALSE	FALSE	FALSE	FALSE
paroxetine4	125	Low risk	2004	paroxetine	Licensed	86	63	10	3	37	42	8	23.6	20	20	20.4	20	cc	0.507814856586973	0.133726080577678	-0.509534468002371	0.364931446174166	0.0782521968997481	0.80267432469083	0.356965599368769	0.200899770016109	FALSE	FALSE	FALSE	FALSE
placebo13	129	Low risk	2005	placebo	Licensed	137	50	40	8	37	42.5	8	0	0	0	0	0	cc	0	NA	0	NA	0	NA	0	NA	FALSE	FALSE	FALSE	FALSE
escitalopram	129	Low risk	2005	escitalopram	Licensed	274	121	66	14	88	43.3	8	22.2	20	12	25.2	10	cc	0.19062035960865	0.131588592592323	-0.192371892647456	0.170887711793523	-0.133531392624523	0.430673503154167	0.173271721274037	0.165655541051829	FALSE	FALSE	FALSE	FALSE
placebo14	131	Low risk	2006	placebo	Licensed	99	51	9	1	33	44.7	8	0	0	0	0	0	cc	0	NA	0	NA	0	NA	0	NA	FALSE	FALSE	FALSE	FALSE
paroxetine5	131	Low risk	2006	paroxetine	Licensed	97	59	11	1	42	45.8	8	23.6	20	20	20.4	20	cc	0.166120682812601	0.127069694373215	0.221079567093358	0.426157146565298	0.020408871631207	1.40697893074078	0.261570928448095	0.183581768324168	FALSE	FALSE	FALSE	FALSE
placebo15	147	Low risk	2002	placebo	Licensed	189	79	29	2	64	40	8	0	0	0	0	0	cc	0	NA	0	NA	0	NA	0	NA	FALSE	FALSE	FALSE	FALSE
escitalopram1	147	Low risk	2002	escitalopram	Licensed	191	104	31	9	89	41	8	22.2	20	12	25.2	10	cc	0.264416633687364	0.108383601519048	0.0561649615116847	0.237095372691186	1.49355098378929	0.774973872931123	0.319226873385481	0.127805898419962	FALSE	FALSE	FALSE	FALSE
placebo16	158	Moderate risk	2006	placebo	Licensed	135	43	30	4	NA	NA	8	0	0	0	0	0	cc	0	NA	0	NA	0	NA	0	NA	FALSE	FALSE	FALSE	TRUE
escitalopram3	158	Moderate risk	2006	escitalopram	Extremely low	138	56	32	6	NA	NA	8	8.88	8	4.8	10.08	4	cc	0.242172668322812	0.162662757236036	0.0425596144187959	0.223449209249735	0.383486201389389	0.634044858387532	NA	NA	FALSE	FALSE	FALSE	TRUE
placebo17	167	Low risk	2011	placebo	Licensed	105	66	19	5	36	34.7	8	0	0	0	0	0	cc	0	NA	0	NA	0	NA	0	NA	FALSE	FALSE	FALSE	FALSE
escitalopram.400	167	Low risk	2011	escitalopram	Licensed	100	68	13	2	38	33.1	8	22.2	20	12	25.2	10	cc	0.0786431273191133	0.10165425707095	-0.330699457535472	0.331708978393163	-0.867500567704723	0.824909807479697	0.102857385439708	0.185929442874582	FALSE	FALSE	FALSE	FALSE
escitalopram.399	167	Low risk	2011	escitalopram	Licensed	105	65	23	14	36	35.9	8	44.4	40	24	50.4	20	cc	-0.0152674721307884	0.10718447410195	0.191055236762709	0.277600829914672	1.02961941718116	0.502375310282017	0	0.191070501407037	FALSE	FALSE	FALSE	FALSE
placebo18	168	Low risk	2011	placebo	Licensed	124	45	21	3	25	36.4	8	0	0	0	0	0	cc	0	NA	0	NA	0	NA	0	NA	FALSE	FALSE	FALSE	FALSE
escitalopram.403	168	Low risk	2011	escitalopram	Licensed	121	60	16	5	37	36.3	8	22.2	20	12	25.2	10	cc	0.312173092460077	0.150199567076404	-0.247442695475346	0.306251642738611	0.535316643774287	0.719030148459982	0.416533107784319	0.225162270569644	FALSE	FALSE	FALSE	FALSE
escitalopram.404	168	Low risk	2011	escitalopram	Licensed	119	55	16	7	32	35.7	8	44.4	40	24	50.4	20	cc	0.241828767955659	0.154713163403992	-0.230775642990134	0.306024786815509	0.888455932880711	0.678028464532947	0.288018150425033	0.234055810708536	FALSE	FALSE	FALSE	FALSE
placebo19	171	Moderate risk	2008	placebo	Licensed	71	33	21	1	14	42.6	8	0	0	0	0	0	cc	0	NA	0	NA	0	NA	0	NA	FALSE	FALSE	FALSE	FALSE
escitalopram5	171	Moderate risk	2008	escitalopram	Licensed	140	97	12	2	57	41.6	8	44.4	40	24	50.4	20	cc	0.399240871468914	0.139229826073421	-1.23857833350341	0.331247666810304	0.0141846349919564	1.21604795785976	0.725031392651303	0.260278825286621	FALSE	FALSE	FALSE	FALSE
placebo20	173	Moderate risk	2008	placebo	Licensed	106	NA	NA	3	NA	NA	NA	0	0	0	0	0	cc	0	NA	0	NA	0	NA	0	NA	TRUE	TRUE	FALSE	TRUE
escitalopram6	173	Moderate risk	2008	escitalopram	Licensed	103	NA	NA	9	NA	NA	NA	22.2	20	12	25.2	10	cc	NA	NA	NA	NA	1.12732239455054	0.652151626783385	NA	NA	TRUE	TRUE	FALSE	TRUE
placebo21	174	Moderate risk	2007	placebo	Licensed	76	22	26	4	10	41.2	8	0	0	0	0	0	cc	0	NA	0	NA	0	NA	0	NA	FALSE	FALSE	FALSE	FALSE
escitalopram7	174	Moderate risk	2007	escitalopram	Licensed	84	30	24	3	14	40.8	8	22.2	20	12	25.2	10	cc	0.210071469746857	0.231787018933923	-0.180126166230519	0.234660496220819	-0.387765531008763	0.747175131205348	0.23638877806423	0.382577985235648	FALSE	FALSE	FALSE	FALSE
placebo22	175	Low risk	2009	placebo	Licensed	99	31	14	3	12	41.8	4	0	0	0	0	0	cc	0	NA	0	NA	0	NA	0	NA	FALSE	FALSE	FALSE	FALSE
escitalopram8	175	Low risk	2009	escitalopram	Licensed	50	14	7	2	10	36.2	4	44.4	40	24	50.4	20	cc	-0.111833030163444	0.271266706109855	-0.0100503358535013	0.429167454712848	0.27763173659828	0.896232293120664	0.500775287912489	0.391449004638309	FALSE	FALSE	FALSE	FALSE
placebo23	176	Low risk	2009	placebo	Licensed	220	54	53	7	14	42.3	8	0	0	0	0	0	cc	0	NA	0	NA	0	NA	0	NA	FALSE	FALSE	FALSE	FALSE
escitalopram.420	176	Low risk	2009	escitalopram	Licensed	325	116	77	16	36	41.4	8	22.2	20	12	25.2	10	cc	0.374408508564714	0.139702650480631	-0.0166841276758139	0.155668108143374	0.436480937207092	0.444673773945311	0.554263972863476	0.302628438161339	FALSE	FALSE	FALSE	FALSE
escitalopram.421	176	Low risk	2009	escitalopram	High	332	123	93	23	50	40.4	8	62.16	56	33.6	70.56	28	cc	0.411692886244016	0.138170536226454	0.150800157037007	0.148536561028318	0.778076644309709	0.422821358245397	0.861458253248761	0.289605021866586	FALSE	FALSE	FALSE	FALSE
placebo24	180	Moderate risk	1990	placebo	Licensed	56	21	19	5	19	39	6	0	0	0	0	0	cc	0	NA	0	NA	0	NA	0	NA	FALSE	FALSE	FALSE	FALSE
fluoxetine.431	180	Moderate risk	1990	fluoxetine	Licensed	107	41	37	8	38	40	6	20	20	20	20	20	cc	0.0215724852541278	0.211675114909194	0.0190017897510269	0.229032025543873	-0.177473514481021	0.545707854763273	0.0456700368331883	0.227474023069419	FALSE	FALSE	FALSE	FALSE
fluoxetine.430	180	Moderate risk	1990	fluoxetine	Licensed	105	39	43	21	37	39.8	6	40	40	40	40	40	cc	-0.00956945101615067	0.214194119618445	0.188152477104748	0.220241777417238	0.806475865866949	0.469295317724453	0.03787027405541	0.228643070293948	FALSE	FALSE	FALSE	FALSE
fluoxetine.429	180	Moderate risk	1990	fluoxetine	Licensed	104	34	51	24	32	38.3	6	60	60	60	60	60	cc	-0.137201121513485	0.222616901542543	0.368347445151662	0.211581886304324	0.949576709507622	0.462811126912631	-0.0977422847729373	0.237505897768542	FALSE	FALSE	FALSE	FALSE
placebo25	181	Moderate risk	1987	placebo	Licensed	48	11	21	6	5	38.6	6	0	0	0	0	0	cc	0	NA	0	NA	0	NA	0	NA	FALSE	FALSE	FALSE	FALSE
fluoxetine.435	181	Moderate risk	1987	fluoxetine	Licensed	100	37	38	8	20	39.4	6	20	20	20	20	20	cc	0.479053464765653	0.295131808863065	-0.140905453077238	0.207609016565752	-0.446287102628419	0.510718448201485	0.65232518603969	0.468152396839605	FALSE	FALSE	FALSE	FALSE
fluoxetine.434	181	Moderate risk	1987	fluoxetine	Licensed	103	37	41	12	21	41.2	6	40	40	40	40	40	cc	0.449494662524109	0.295624841207073	-0.0944783483408601	0.203635017430882	-0.0703807967617995	0.468463369755405	0.671556547967578	0.465915203037674	FALSE	FALSE	FALSE	FALSE
fluoxetine.433	181	Moderate risk	1987	fluoxetine	Licensed	105	30	58	30	16	39.9	6	60	60	60	60	60	cc	0.220542769614152	0.306407051787783	0.233161233573364	0.185750596425017	0.826678573184468	0.411877235523957	0.380391470556048	0.481812055829716	FALSE	FALSE	FALSE	FALSE
placebo26	205	Low risk	1994	placebo	Licensed	43	17	10	0	9	39.2	8	0	0	0	0	0	cc	0	NA	0	NA	0	NA	0	NA	FALSE	FALSE	FALSE	FALSE
fluoxetine4	205	Low risk	1994	fluoxetine	Licensed	46	25	14	2	16	41.6	8	20	20	20	20	20	cc	0.318221200016452	0.232009881305719	0.26903095582568	0.355575065267941	1.54274653793543	1.53476581858888	0.507922864108029	0.358630961745971	FALSE	FALSE	FALSE	FALSE
placebo27	206	Moderate risk	1995	placebo	Licensed	32	13	NA	1	11	38.1	5	0	0	0	0	0	cc	0	NA	0	NA	0	NA	0	NA	FALSE	TRUE	FALSE	FALSE
fluoxetine5	206	Moderate risk	1995	fluoxetine	Licensed	36	23	NA	2	17	40.9	5	20	20	20	20	20	cc	0.452761822811229	0.24773687657445	NA	NA	0.575364144903562	1.20040502424066	0.317535035601462	0.301172446520391	FALSE	TRUE	FALSE	FALSE
placebo28	208	Low risk	1995	placebo	Licensed	72	10	9	4	NA	33.9	9	0	0	0	0	0	cc	0	NA	0	NA	0	NA	0	NA	FALSE	FALSE	FALSE	TRUE
fluoxetine6	208	Low risk	1995	fluoxetine	Licensed	72	14	12	3	NA	33.9	9	20	20	20	20	20	cc	0.336472236621213	0.379012920163408	0.287682072451781	0.408248290463863	-0.287682072451781	0.74535599249993	NA	NA	FALSE	FALSE	FALSE	TRUE
placebo29	213	Moderate risk	2000	placebo	Licensed	35	9	12	4	6	42	8	0	0	0	0	0	cc	0	NA	0	NA	0	NA	0	NA	FALSE	FALSE	FALSE	FALSE
fluoxetine7	213	Moderate risk	2000	fluoxetine	Licensed	35	17	5	1	9	42	8	20	20	20	20	20	cc	0.635988766719997	0.33584487993718	-0.8754687373539	0.475594865605671	-1.38629436111989	1.09217999563128	0.405465108108164	0.469717916025055	FALSE	FALSE	FALSE	FALSE
placebo30	216	Moderate risk	2004	placebo	Licensed	10	3	NA	NA	2	31.9	9	0	0	0	0	0	cc	0	NA	0	NA	0	NA	0	NA	FALSE	TRUE	TRUE	FALSE
fluoxetine8	216	Moderate risk	2004	fluoxetine	Licensed	10	6	NA	NA	6	31.9	9	20	20	20	20	20	cc	0.693147180559945	0.547722557505166	NA	NA	NA	NA	1.09861228866811	0.683130051063973	FALSE	TRUE	TRUE	FALSE
placebo31	217	Moderate risk	2010	placebo	Licensed	14	NA	NA	NA	NA	42.4	8	0	0	0	0	0	cc	0	NA	0	NA	0	NA	0	NA	TRUE	TRUE	TRUE	TRUE
fluoxetine9	217	Moderate risk	2010	fluoxetine	Licensed	14	NA	NA	NA	NA	42.4	8	20	20	20	20	20	cc	NA	NA	NA	NA	NA	NA	NA	NA	TRUE	TRUE	TRUE	TRUE
placebo32	219	Low risk	2013	placebo	Licensed	260	72	14	3	39	38.5	6	0	0	0	0	0	cc	0	NA	0	NA	0	NA	0	NA	FALSE	FALSE	FALSE	FALSE
fluoxetine.512	219	Low risk	2013	fluoxetine	Licensed	169	40	15	8	16	40.5	6	20	20	20	20	20	cc	-0.157003748809665	0.170662167100449	0.499775787579406	0.358234454632397	1.41161216910418	0.669753700791467	-0.460190007797411	0.279960197227317	FALSE	FALSE	FALSE	FALSE
fluoxetine.513	219	Low risk	2013	fluoxetine	Licensed	84	15	7	4	8	39.6	6	40	40	40	40	40	cc	-0.438751085741631	0.25456755450104	0.436717651612269	0.445572439155294	1.417546904624	0.753380659150749	-0.454255272277596	0.367273889475021	FALSE	FALSE	FALSE	FALSE
placebo33	220	Moderate risk	2005	placebo	Licensed	43	15	22	0	8	37.8	8	0	0	0	0	0	cc	0	NA	0	NA	0	NA	0	NA	FALSE	FALSE	FALSE	FALSE
fluoxetine10	220	Moderate risk	2005	fluoxetine	Licensed	47	15	23	2	9	36.7	8	20	20	20	20	20	cc	-0.0889474860164962	0.29799483826933	-0.0444957234456624	0.210714016206662	1.52146913948814	1.53491330786919	0.0288355496398873	0.437697042956589	FALSE	FALSE	FALSE	FALSE
placebo34	221	Low risk	2005	placebo	Licensed	58	23	6	2	4	51.4	6	0	0	0	0	0	cc	0	NA	0	NA	0	NA	0	NA	FALSE	FALSE	FALSE	FALSE
fluoxetine11	221	Low risk	2005	fluoxetine	Licensed	57	20	9	4	15	50.4	6	20	20	20	20	20	cc	-0.12237019966329	0.242266427534022	0.422856850820033	0.492942733812266	0.710538923271815	0.845703707595357	1.33914758269419	0.530925067883594	FALSE	FALSE	FALSE	FALSE
placebo35	222	Moderate risk	2005	placebo	Licensed	26	11	NA	NA	12	45.9	8	0	0	0	0	0	cc	0	NA	0	NA	0	NA	0	NA	FALSE	TRUE	TRUE	FALSE
fluoxetine12	222	Moderate risk	2005	fluoxetine	Licensed	20	11	NA	NA	7	37.7	8	20	20	20	20	20	cc	0.262364264467491	0.305543193929505	NA	NA	NA	NA	-0.276632236265196	0.371118495536045	FALSE	TRUE	TRUE	FALSE
placebo39	322	Moderate risk	NA	placebo	Licensed	NA	NA	NA	NA	NA	NA	8	0	0	0	0	0	cc	0	NA	0	NA	0	NA	0	NA	TRUE	TRUE	TRUE	TRUE
fluoxetine14	322	Moderate risk	NA	fluoxetine	Licensed	NA	NA	NA	NA	NA	NA	8	20	20	20	20	20	cc	NA	NA	NA	NA	NA	NA	NA	NA	TRUE	TRUE	TRUE	TRUE
placebo40	332	Moderate risk	1986	placebo	Licensed	10	5	4	1	1	51.6	6	0	0	0	0	0	cc	0	NA	0	NA	0	NA	0	NA	FALSE	FALSE	FALSE	FALSE
paroxetine6	332	Moderate risk	1986	paroxetine	Licensed	19	12	7	6	2	39.7	6	35.4	30	30	30.6	30	cc	0.233614851181505	0.36152697601419	-0.0822380982369722	0.490128109691512	1.14990558305566	1.00699309219046	0.0512932943875505	1.16076200017602	FALSE	FALSE	FALSE	FALSE
placebo41	347	Moderate risk	1988	placebo	Licensed	25	5	5	NA	2	43.3	4	0	0	0	0	0	cc	0	NA	0	NA	0	NA	0	NA	FALSE	FALSE	TRUE	FALSE
paroxetine7	347	Moderate risk	1988	paroxetine	Licensed	22	3	10	NA	1	41.6	4	35.4	30	30	30.6	30	cc	-0.382992252256106	0.669237467479809	0.82098055206983	0.463190516467527	NA	NA	-0.56531380905006	1.18934665028555	FALSE	FALSE	TRUE	FALSE
placebo42	360	Moderate risk	1992	placebo	Licensed	53	20	19	2	10	40.9	6	0	0	0	0	0	cc	0	NA	0	NA	0	NA	0	NA	FALSE	FALSE	FALSE	TRUE
paroxetine.825	360	Moderate risk	1992	paroxetine	Extremely low	105	30	34	11	NA	NA	6	11.8	10	10	10.2	10	cc	-0.278203328497237	0.234396244170469	-0.10174689115568	0.231628171000721	1.02107965563302	0.750011571148725	NA	NA	FALSE	FALSE	FALSE	TRUE
paroxetine.826	360	Moderate risk	1992	paroxetine	Licensed	106	48	41	16	26	41.6	6	23.6	20	20	20.4	20	cc	0.182321556793955	0.206231536242352	0.0759859069779223	0.220725929734942	1.38629436111989	0.730888577833549	0.262364264467491	0.331903075715013	FALSE	FALSE	FALSE	TRUE
paroxetine.827	360	Moderate risk	1992	paroxetine	Licensed	104	45	44	24	20	41.6	6	35.4	30	30	30.6	30	cc	0.136831230627078	0.209138502142804	0.16565166916257	0.216507603864055	1.81080766419875	0.716368171768526	0.0190481949706944	0.348592442339637	FALSE	FALSE	FALSE	TRUE
paroxetine.828	360	Moderate risk	1992	paroxetine	Licensed	106	42	41	18	20	41.4	6	47.2	40	40	40.8	40	cc	0.048790164169432	0.213325190770033	0.0759859069779223	0.220725929734942	1.50407739677627	0.726122351097322	0	0.348852566577268	FALSE	FALSE	FALSE	TRUE
placebo43	365	Moderate risk	1989	placebo	Licensed	21	3	14	3	1	43.3	6	0	0	0	0	0	cc	0	NA	0	NA	0	NA	0	NA	FALSE	FALSE	FALSE	FALSE
paroxetine8	365	Moderate risk	1989	paroxetine	Licensed	21	7	10	2	10	45.1	6	35.4	30	30	30.6	30	cc	0.847297860387204	0.617213399848368	-0.336472236621213	0.276026223736942	-0.405465108108164	0.859124692984225	2.30258509299405	1.00237812464254	FALSE	FALSE	FALSE	FALSE
placebo44	377	Moderate risk	1998	placebo	Licensed	70	20	NA	6	12	NA	6	0	0	0	0	0	cc	0	NA	0	NA	0	NA	0	NA	FALSE	TRUE	FALSE	FALSE
paroxetine9	377	Moderate risk	1998	paroxetine	Licensed	72	33	NA	14	24	NA	6	23.6	20	20	20.4	20	cc	0.472604410945793	0.228316506473858	NA	NA	0.819126983420507	0.458170966911518	0.664976303593249	0.31116779528961	FALSE	TRUE	FALSE	FALSE
placebo45	382	Moderate risk	2002	placebo	Licensed	149	72	36	6	37	38.4	8	0	0	0	0	0	cc	0	NA	0	NA	0	NA	0	NA	FALSE	FALSE	FALSE	FALSE
paroxetine.880	382	Moderate risk	2002	paroxetine	Extremely low	156	82	29	1	51	NA	8	14.75	12.5	12.5	12.75	12.5	cc	0.0841434269441199	0.11385229481165	-0.262132809773714	0.221672890972798	-1.83766917053213	1.07403212282521	0.274998018776023	0.183066120180803	FALSE	FALSE	FALSE	FALSE
paroxetine.881	382	Moderate risk	2002	paroxetine	Licensed	154	91	44	10	58	39.4	8	29.5	25	25	25.5	25	cc	0.201187091032625	0.108041584533087	0.167664398993981	0.193132427664468	0.477819327297821	0.503449849316878	0.416518801434025	0.17624837714967	FALSE	FALSE	FALSE	FALSE
placebo46	385	Moderate risk	2003	placebo	Licensed	125	59	40	3	29	38	8	0	0	0	0	0	cc	0	NA	0	NA	0	NA	0	NA	FALSE	FALSE	FALSE	FALSE
paroxetine10	385	Moderate risk	2003	paroxetine	Licensed	125	57	64	13	32	37.9	8	23.6	20	20	20.4	20	cc	-0.0344861760711692	0.135989014966267	0.470003629245736	0.156923548264752	1.46633706879343	0.627898407591873	0.0984400728132525	0.223008427241415	FALSE	FALSE	FALSE	FALSE
placebo47	386	Moderate risk	2004	placebo	Licensed	180	71	53	13	49	68	10	0	0	0	0	0	cc	0	NA	0	NA	0	NA	0	NA	FALSE	FALSE	FALSE	TRUE
paroxetine.888	386	Moderate risk	2004	paroxetine	Extremely low	168	83	39	10	NA	NA	10	14.75	12.5	12.5	12.75	12.5	cc	0.225153602242234	0.120932887608795	-0.237737395935524	0.181661811235579	-0.19337139298054	0.406712601741255	NA	NA	FALSE	FALSE	FALSE	TRUE
paroxetine.889	386	Moderate risk	2004	paroxetine	Licensed	177	100	39	14	71	67	10	29.5	25	25	25.5	25	cc	0.359297427263157	0.11348671275781	-0.289923149106094	0.182492950821799	0.0909150904701033	0.37033278990925	0.38766669724707	0.152602087921102	FALSE	FALSE	FALSE	TRUE
placebo48	392	Moderate risk	2012	placebo	Licensed	156	97	41	3	39	41.8	8	0	0	0	0	0	cc	0	NA	0	NA	0	NA	0	NA	FALSE	FALSE	FALSE	FALSE
paroxetine11	392	Moderate risk	2012	paroxetine	Licensed	166	136	38	10	75	44.4	8	35.4	30	30	30.6	30	cc	0.275812126125663	0.0723039883491047	-0.138117688084928	0.195631491790879	1.14184102321893	0.648767277640862	0.591794686299658	0.162911037620415	FALSE	FALSE	FALSE	FALSE
placebo49	393	Moderate risk	1991	placebo	Licensed	4	NA	1	1	NA	46.5	NA	0	0	0	0	0	cc	0	NA	0	NA	0	NA	0	NA	TRUE	FALSE	FALSE	TRUE
paroxetine12	393	Moderate risk	1991	paroxetine	Licensed	4	NA	1	1	NA	49.3	NA	35.4	30	30	30.6	30	cc	NA	NA	0	1.22474487139159	0	1.22474487139159	NA	NA	TRUE	FALSE	FALSE	TRUE
placebo50	395	Moderate risk	2003	placebo	Licensed	155	NA	46	9	NA	41.4	NA	0	0	0	0	0	cc	0	NA	0	NA	0	NA	0	NA	TRUE	FALSE	FALSE	TRUE
paroxetine13	395	Moderate risk	2003	paroxetine	Licensed	154	NA	45	11	NA	39	NA	23.6	20	20	20.4	20	cc	NA	NA	-0.0155063922131578	0.176114261944547	0.207143209967768	0.434827647032097	NA	NA	TRUE	FALSE	FALSE	TRUE
placebo51	396	Moderate risk	2003	placebo	Licensed	145	NA	45	8	NA	41.1	NA	0	0	0	0	0	cc	0	NA	0	NA	0	NA	0	NA	TRUE	FALSE	FALSE	TRUE
paroxetine14	396	Moderate risk	2003	paroxetine	Licensed	143	NA	43	14	NA	42.2	NA	23.6	20	20	20.4	20	cc	NA	NA	-0.0315732619160903	0.177731475711439	0.57350490009609	0.427245845750929	NA	NA	TRUE	FALSE	FALSE	TRUE
placebo52	397	Moderate risk	2003	placebo	Licensed	161	76	48	8	32	41.3	8	0	0	0	0	0	cc	0	NA	0	NA	0	NA	0	NA	FALSE	FALSE	FALSE	FALSE
paroxetine15	397	Moderate risk	2003	paroxetine	Licensed	164	105	33	8	49	40.6	8	23.6	20	20	20.4	20	cc	0.304764947031457	0.101847744996236	-0.393155512281146	0.197047259652425	-0.0184620628397353	0.487535905242031	0.407622332471165	0.198366887774832	FALSE	FALSE	FALSE	FALSE
placebo53	398	Moderate risk	2007	placebo	Licensed	79	40	22	5	18	40.1	8	0	0	0	0	0	cc	0	NA	0	NA	0	NA	0	NA	FALSE	FALSE	FALSE	FALSE
paroxetine16	398	Moderate risk	2007	paroxetine	Licensed	80	54	16	7	32	40	8	23.6	20	20	20.4	20	cc	0.287525810243478	0.135500150075257	-0.331032513325395	0.287743492726498	0.323893454414353	0.563647864370159	0.562785362696702	0.248288798997164	FALSE	FALSE	FALSE	FALSE
placebo54	440	Moderate risk	2008	placebo	Licensed	39	17	12	4	8	49	6	0	0	0	0	0	cc	0	NA	0	NA	0	NA	0	NA	FALSE	FALSE	FALSE	FALSE
sertraline	440	Moderate risk	2008	sertraline	Licensed	43	25	14	4	18	49	6	41	40	17	43	100	cc	0.288024011248069	0.223442811066391	0.0565122102633424	0.325369121410423	-0.0976384695639159	0.671642137157494	0.713291746652413	0.362848061812436	FALSE	FALSE	FALSE	FALSE
placebo55	441	Low risk	2012	placebo	Licensed	30	5	4	NA	4	46.4	6	0	0	0	0	0	cc	0	NA	0	NA	0	NA	0	NA	FALSE	FALSE	TRUE	FALSE
sertraline1	441	Low risk	2012	sertraline	Licensed	30	10	6	NA	9	41	6	20.5	20	8.5	21.5	50	cc	0.693147180559945	0.483045891539648	0.405465108108164	0.591607978309962	NA	NA	0.810930216216329	0.542627353203324	FALSE	FALSE	TRUE	FALSE
placebo56	442	High risk	NA	placebo	Licensed	26	NA	8	NA	NA	NA	NA	0	0	0	0	0	cc	0	NA	0	NA	0	NA	0	NA	TRUE	FALSE	TRUE	TRUE
sertraline.1008	442	High risk	NA	sertraline	Licensed	26	NA	9	NA	NA	NA	NA	20.5	20	8.5	21.5	50	cc	NA	NA	0.117783035656383	0.398983751784498	NA	NA	NA	NA	TRUE	FALSE	TRUE	TRUE
sertraline.1009	442	High risk	NA	sertraline	Licensed	24	NA	10	NA	NA	NA	NA	41	40	17	43	100	cc	NA	NA	0.303186258987746	0.380620276485364	NA	NA	NA	NA	TRUE	FALSE	TRUE	TRUE
sertraline.1010	442	High risk	NA	sertraline	Licensed	23	NA	12	NA	NA	NA	NA	82	80	34	86	200	cc	NA	NA	0.528067430200497	0.355518683056502	NA	NA	NA	NA	TRUE	FALSE	TRUE	TRUE
placebo57	443	Moderate risk	NA	placebo	Licensed	91	22	45	4	7	37	6	0	0	0	0	0	cc	0	NA	0	NA	0	NA	0	NA	FALSE	FALSE	FALSE	FALSE
sertraline.1012	443	Moderate risk	NA	sertraline	Licensed	95	38	36	10	18	37	6	20.5	20	8.5	21.5	50	cc	0.503526321284379	0.224176288107697	-0.266160936397901	0.168774030056509	0.873273346790464	0.573135824409463	0.901444223757161	0.420591692302896	FALSE	FALSE	FALSE	FALSE
sertraline.1013	443	Moderate risk	NA	sertraline	Licensed	92	34	45	15	16	37	6	41	40	17	43	100	cc	0.424389000725655	0.230234085126476	-0.0109290705321903	0.150285954892805	1.31082676945013	0.542962328767166	0.815749502652278	0.428367326777779	FALSE	FALSE	FALSE	FALSE
sertraline.1014	443	Moderate risk	NA	sertraline	Licensed	91	27	52	33	10	38	6	82	80	34	86	200	cc	0.204794412646013	0.245995041644259	0.144581228811107	0.139552748002214	2.11021320034659	0.508256833033269	0.356674943938732	0.469977787644396	FALSE	FALSE	FALSE	FALSE
placebo58	444	Moderate risk	NA	placebo	Licensed	34	NA	8	NA	NA	NA	NA	0	0	0	0	0	cc	0	NA	0	NA	0	NA	0	NA	TRUE	FALSE	TRUE	TRUE
sertraline.1016	444	Moderate risk	NA	sertraline	Licensed	33	NA	10	NA	NA	NA	NA	20.5	20	8.5	21.5	50	cc	NA	NA	0.252996514463891	0.406552831734188	NA	NA	NA	NA	TRUE	FALSE	TRUE	TRUE
sertraline.1017	444	Moderate risk	NA	sertraline	Licensed	35	NA	10	NA	NA	NA	NA	41	40	17	43	100	cc	NA	NA	0.194156014440957	0.408676897711002	NA	NA	NA	NA	TRUE	FALSE	TRUE	TRUE
sertraline.1018	444	Moderate risk	NA	sertraline	Licensed	37	NA	10	NA	NA	NA	NA	82	80	34	86	200	cc	NA	NA	0.138586163286147	0.410562063843082	NA	NA	NA	NA	TRUE	FALSE	TRUE	TRUE
placebo65	523	Moderate risk	NA	placebo	Licensed	99	42	NA	NA	22	NA	8	0	0	0	0	0	cc	0	NA	0	NA	0	NA	0	NA	FALSE	TRUE	TRUE	FALSE
fluoxetine15	523	Moderate risk	NA	fluoxetine	Licensed	92	43	NA	NA	22	NA	8	20	20	20	20	20	cc	0.0968617704957437	0.161538733573749	NA	NA	NA	NA	0.0733312730855497	0.264458910968584	FALSE	TRUE	TRUE	FALSE
placebo66	524	Moderate risk	NA	placebo	Licensed	129	54	NA	NA	27	NA	8	0	0	0	0	0	cc	0	NA	0	NA	0	NA	0	NA	FALSE	TRUE	TRUE	FALSE
citalopram3	524	Moderate risk	NA	citalopram	Licensed	117	53	NA	NA	28	NA	8	20	20	12	24.6	20	cc	0.0789463365517634	0.145215345316243	NA	NA	NA	NA	0.134006113734791	0.237597087986823	FALSE	TRUE	TRUE	FALSE
placebo67	528	Low risk	2013	placebo	Licensed	290	125	80	7	87	42.6	8	0	0	0	0	0	cc	0	NA	0	NA	0	NA	0	NA	FALSE	FALSE	FALSE	FALSE
citalopram4	528	Low risk	2013	citalopram	Licensed	289	151	89	17	74	42	8	40	40	24	49.2	40	cc	0.192420334380711	0.0878295683797073	0.110063969926346	0.129720744608	0.89075742986899	0.441330022539122	-0.158388790582326	0.134533575409825	FALSE	FALSE	FALSE	FALSE
placebo69	545	Moderate risk	1988	placebo	Licensed	77	18	35	4	NA	NA	6	0	0	0	0	0	cc	0	NA	0	NA	0	NA	0	NA	FALSE	FALSE	FALSE	TRUE
fluoxetine.1273	545	Moderate risk	1988	fluoxetine	Very low	94	43	30	8	NA	NA	6	5	5	5	5	5	cc	0.671338997381078	0.234917131452115	-0.353640040243578	0.195651350737501	0.493657820143625	0.592768664101474	NA	NA	FALSE	FALSE	FALSE	TRUE
fluoxetine.1274	545	Moderate risk	1988	fluoxetine	Licensed	91	45	31	4	NA	NA	6	20	20	20	20	20	cc	0.749236647210989	0.231952050652185	-0.288414941667434	0.191972573852448	-0.167054084663166	0.68994490796293	NA	NA	FALSE	FALSE	FALSE	TRUE
fluoxetine.1275	545	Moderate risk	1988	fluoxetine	Licensed	92	44	37	11	NA	NA	6	40	40	40	40	40	cc	0.71583472082674	0.233294342148334	-0.122413304040546	0.178162502772192	0.833617756483123	0.56307416270389	NA	NA	FALSE	FALSE	FALSE	TRUE
placeborep.1	139001	Moderate risk	2000	placebo	Licensed	64	16	36	3	12	40.3	8	0	0	0	0	0	cc	0	NA	0	NA	0	NA	0	NA	FALSE	FALSE	FALSE	FALSE
citalopram2	139001	Moderate risk	2000	citalopram	Licensed	127	48	34	11	23	40	8	40	40	24	49.2	40	cc	0.41330828556919	0.244610542669979	-0.742462416938868	0.183549793613691	0.613978981031341	0.633042975235009	-0.0347164369577699	0.321422741035645	FALSE	FALSE	FALSE	FALSE
placeborep.2	139002	Moderate risk	2000	placebo	Licensed	64	16	36	3	12	40.3	8	0	0	0	0	0	cc	0	NA	0	NA	0	NA	0	NA	FALSE	FALSE	FALSE	FALSE
escitalopram.334	139002	Moderate risk	2000	escitalopram	Licensed	124	47	29	5	21	40.6	8	22.2	20	12	25.2	10	cc	0.416160397224912	0.245126660352661	-0.877621590715001	0.196395061723647	-0.150572858479374	0.713893421460305	-0.101782694309942	0.327510098811241	FALSE	FALSE	FALSE	FALSE
escitalopram.335	139002	Moderate risk	2000	escitalopram	Licensed	128	55	34	13	26	39.6	8	44.4	40	24	50.4	20	cc	0.541597282432744	0.239257848736083	-0.750305594399894	0.183717289561054	0.773189888233482	0.621947674854091	0.0800427076735364	0.313619788589419	FALSE	FALSE	FALSE	FALSE
placeborep.11	154001	Moderate risk	2005	placebo	Licensed	90	42	20	5	76	75	8	0	0	0	0	0	cc	0	NA	0	NA	0	NA	0	NA	FALSE	FALSE	FALSE	FALSE
escitalopram2	154001	Moderate risk	2005	escitalopram	Licensed	174	78	30	17	68	75	8	22.2	20	12	25.2	10	cc	-0.0402064204780405	0.140612229489984	-0.253780520776099	0.257827647441931	0.564529802737852	0.491899676625094	-0.770471263994488	0.104907290222799	FALSE	FALSE	FALSE	FALSE
placeborep.21	154002	Moderate risk	2005	placebo	Licensed	90	42	20	5	76	75	8	0	0	0	0	0	cc	0	NA	0	NA	0	NA	0	NA	FALSE	FALSE	FALSE	FALSE
fluoxetine3	154002	Moderate risk	2005	fluoxetine	Licensed	164	61	42	20	49	75	8	20	20	20	20	20	cc	-0.22685251160399	0.151638696729277	0.141880587235444	0.237909335089658	0.786237603625957	0.482484536449904	-1.03896979966964	0.127895996479277	FALSE	FALSE	FALSE	FALSE
citalopram.387	161001	Low risk	2007	citalopram	Extremely low	111	47	5	NA	27	NA	8	10	10	6	12.3	10	cc	0	NA	0	NA	0	NA	0	NA	FALSE	FALSE	TRUE	FALSE
citalopram.388	161001	Low risk	2007	citalopram	Licensed	110	90	2	NA	55	35.1	8	20	20	12	24.6	20	cc	0.658711904140124	0.119531538749712	-0.907240896354237	0.825772415317975	NA	NA	0.72054615474806	0.192662754882559	FALSE	FALSE	TRUE	FALSE
placeborep.12	293001	Moderate risk	2001	placebo	Licensed	36	12	21	3	12	40.2	8	0	0	0	0	0	cc	0	NA	0	NA	0	NA	0	NA	FALSE	FALSE	FALSE	FALSE
fluoxetine13	293001	Moderate risk	2001	fluoxetine	Licensed	210	80	42	12	41	40.8	8	60	60	60	60	60	cc	0.133531392624523	0.251582294276944	-1.07044141170141	0.197202659436654	-0.377294231141468	0.619779786800912	-0.534923175345051	0.274196817443401	FALSE	FALSE	FALSE	FALSE
placeborep.13	381001	Moderate risk	2001	placebo	Licensed	52	18	18	2	19	40.2	6	0	0	0	0	0	cc	0	NA	0	NA	0	NA	0	NA	FALSE	FALSE	FALSE	FALSE
citalopram.877	381001	Moderate risk	2001	citalopram	Licensed	107	54	17	5	28	38.4	6	20	20	12	24.6	20	cc	0.377027172787631	0.213301454403812	-0.778743529720427	0.29292067414921	0.194705615993676	0.819404318011998	-0.333819584871715	0.244477608460083	FALSE	FALSE	FALSE	FALSE
citalopram.878	381001	Moderate risk	2001	citalopram	Licensed	100	48	26	5	28	39.6	6	40	40	24	49.2	40	cc	0.326902785605062	0.217159203484724	-0.286201687281347	0.254531579153402	0.262364264467491	0.819005024874225	-0.2661609363979	0.243135960793308	FALSE	FALSE	FALSE	FALSE
placeborep.23	381002	Moderate risk	2001	placebo	Licensed	52	18	18	2	19	40.2	6	0	0	0	0	0	cc	0	NA	0	NA	0	NA	0	NA	FALSE	FALSE	FALSE	TRUE
paroxetine.876	381002	Moderate risk	2001	paroxetine	Extremely low	96	34	18	2	NA	NA	6	14.75	12.5	12.5	12.75	12.5	cc	0.0228842938335878	0.235201794984651	-0.613104472886409	0.285418421293502	-0.613104472886409	0.985064751223271	NA	NA	FALSE	FALSE	FALSE	TRUE
paroxetine.875	381002	Moderate risk	2001	paroxetine	Licensed	103	43	23	9	23	41.5	6	29.5	25	25	25.5	25	cc	0.187343088149189	0.223320089589354	-0.438362811615223	0.264753298997905	0.820592127128066	0.763001706430768	-0.492430032885499	0.259172399614787	FALSE	FALSE	FALSE	TRUE
placeborep.14	479001	Moderate risk	NA	placebo	Licensed	42	20	24	3	24	NA	8	0	0	0	0	0	cc	0	NA	0	NA	0	NA	0	NA	FALSE	FALSE	FALSE	FALSE
paroxetine17	479001	Moderate risk	NA	paroxetine	Licensed	81	35	28	7	21	NA	8	23.6	20	20	20.4	20	cc	-0.0971637484536477	0.205951998653956	-0.502628856561812	0.203041250880413	0.190518323998133	0.663351545840218	-0.790310929013593	0.230500567165994	FALSE	FALSE	FALSE	FALSE
